# Supplementary material
Source: publisher figshare collection journal article supplement (https://acs.figshare.com/ndownloader/files/3885385)
Supplement: Supplementary file 1 [file 3885385]

# **Rutile-deposited PtPd clusters: a hypothesis regarding the stability at 50/50 ratio**

Mai-Anh Ha,<sup>1,a</sup> Jonny Dadras,<sup>1,a</sup> and Anastassia Alexandrova<sup>1,2,\*</sup>

<sup>1</sup> *Department of Chemistry & Biochemistry, University of California, Los Angeles, and* <sup>2</sup> *California NanoSystems Institute, Los Angeles, CA 90095.*

<sup>a</sup> These Authors equally contributed to this work

\* Corresponding Author: [ana@chem.ucla.edu](mailto:ana@chem.ucla.edu)

## **Supporting Information**

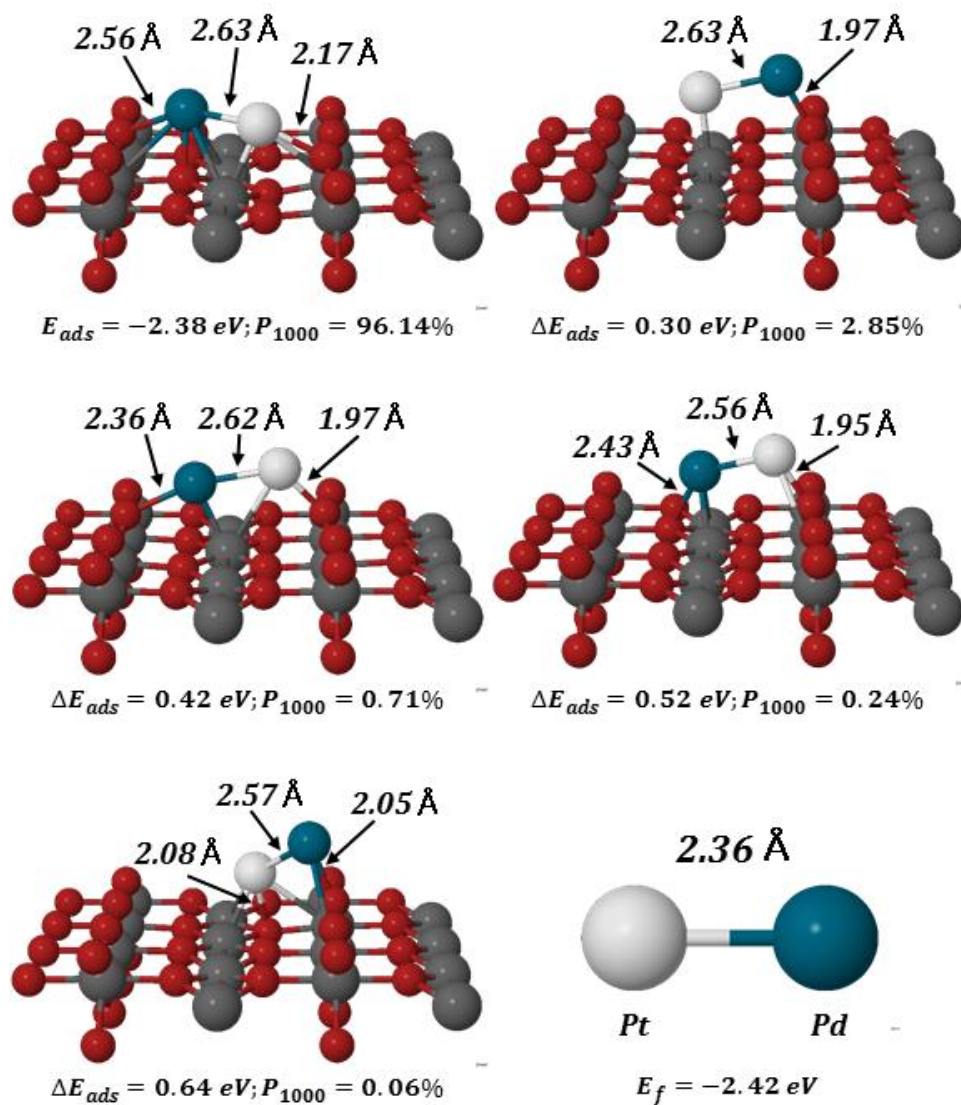

**Figure S1.** Structures of the gas phase and surface-deposited dimers: both the global and low-energy local minima are shown, with their relative energies and Boltzmann populations at 1,000 K. The absolute adsorption energy is displayed for the global minimum, all adsorption energies following the global minimum are relative adsorption energies.

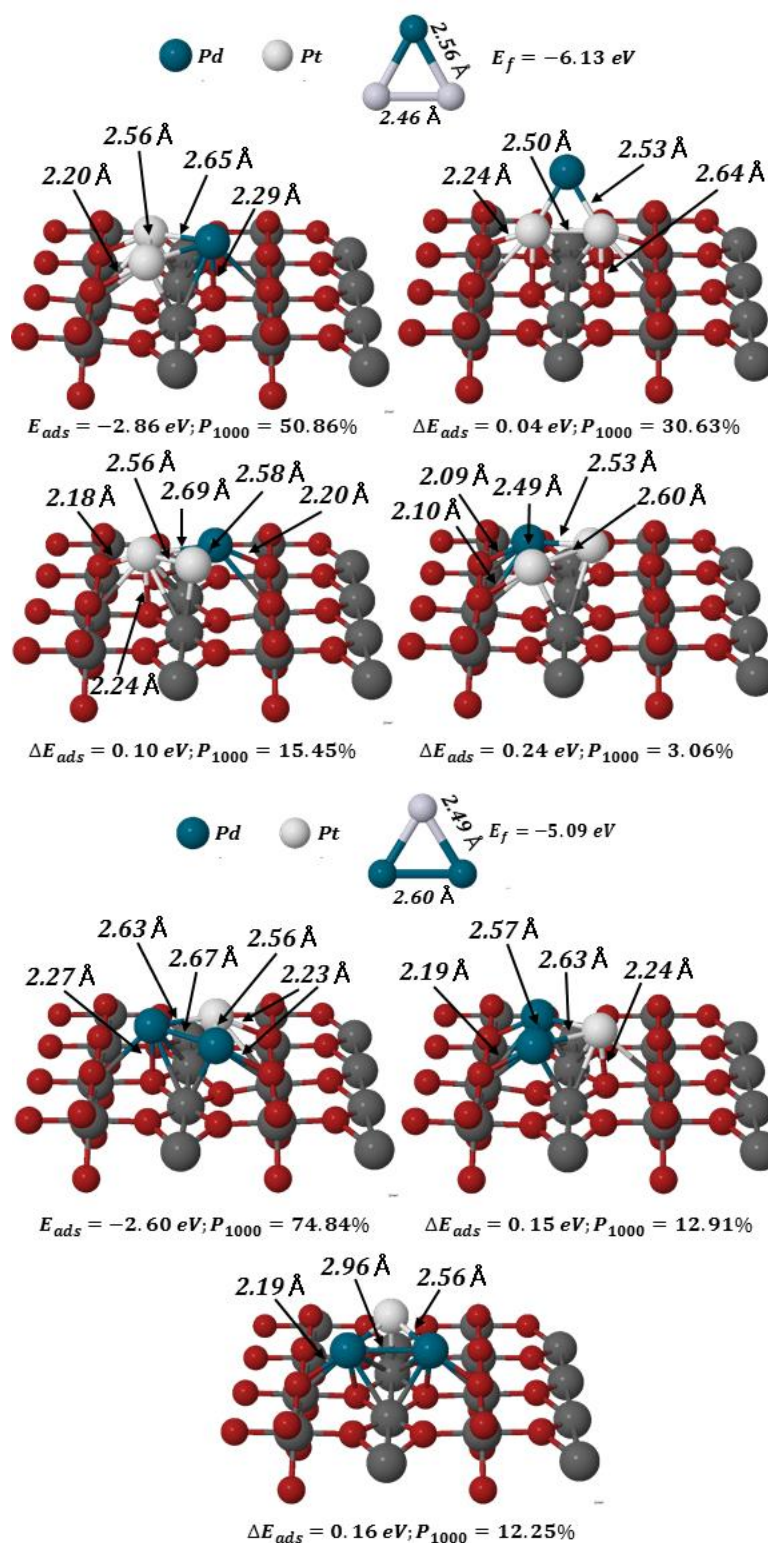

**Figure S2.** Structures of the gas phase and surface-deposited Pt<sub>2</sub>Pd (left) and Pd<sub>2</sub>Pt (right) trimers: both the global and low-energy local minima are shown, with their relative energies and Boltzmann populations at 1,000 K.

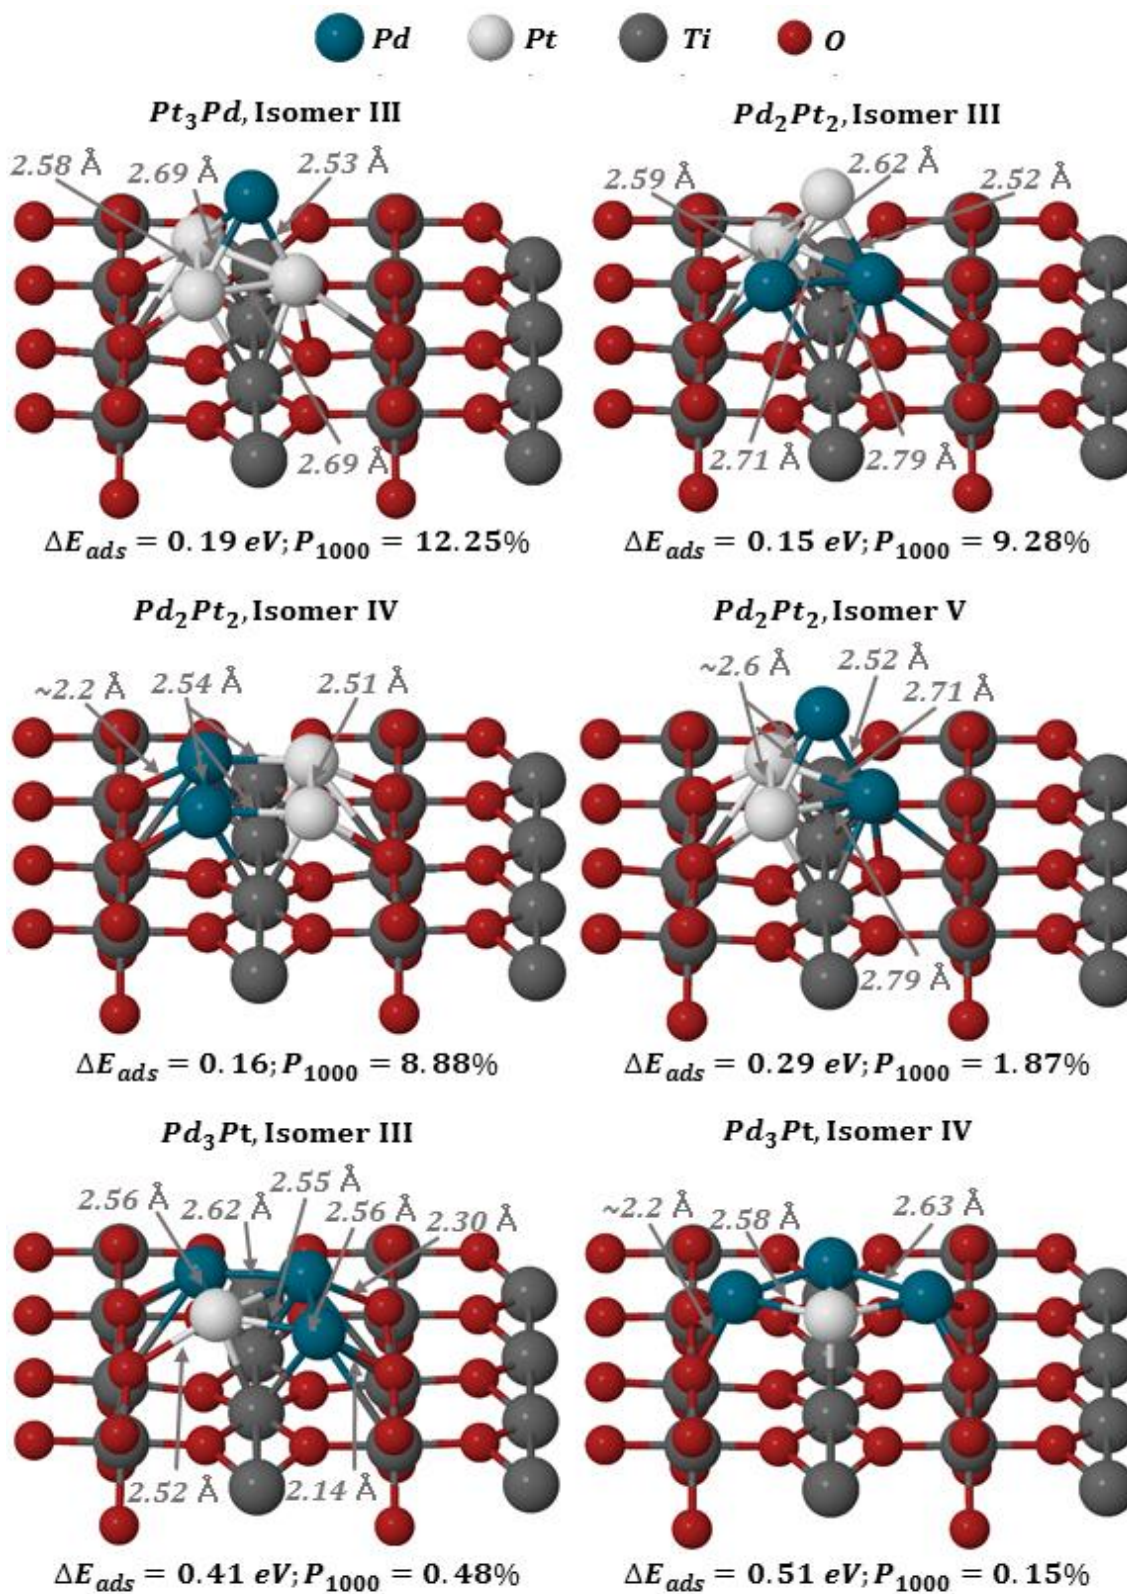

**Figure S3.** Less probable structures of the surface-deposited tetramers, with their relative energies and Boltzmann populations at 1,000 K. *Pd<sub>3</sub>Pt* Isomers III and IV are structures,



which minimize coordination to surface oxygen due to their distortion into a rhombus or a diamond.

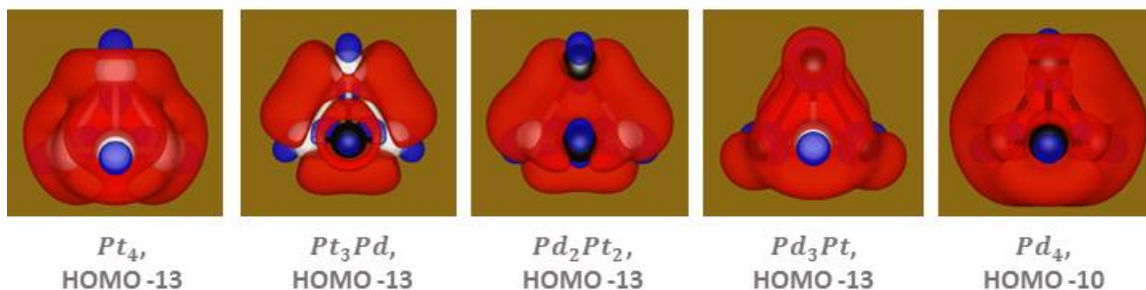

**Figure S4.**  $\sigma$ - aromaticity of gas-phase global minima clusters; for clarity, Pt is white and Pd is black.

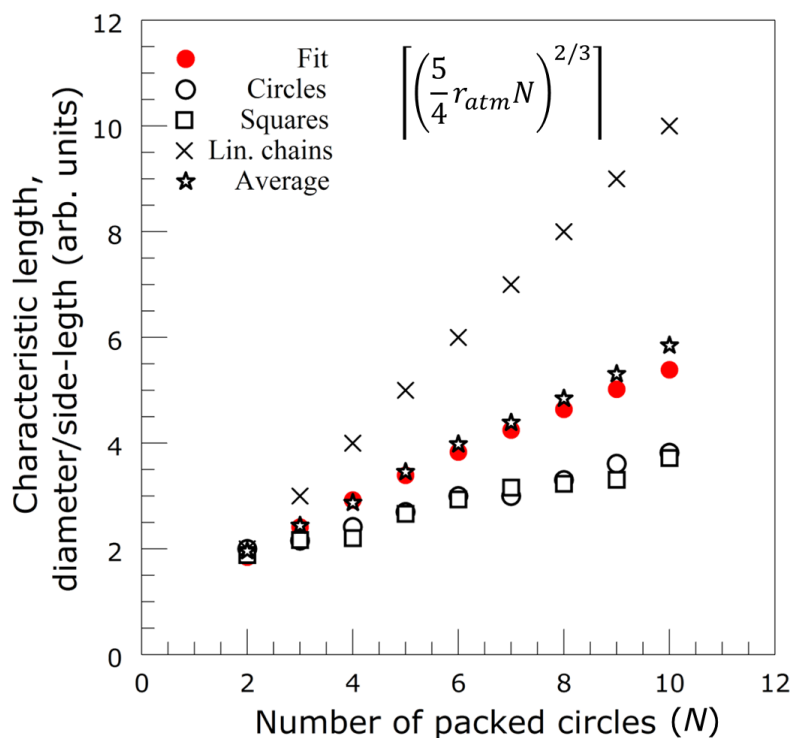

**Figure S5.** Analytical fit to the average size of a particle formed by optimally packing unit-circles into circles, squares, and linear chains. Used to ensure that a monomer properly dissociates from a filamentary-like  $N$ -mer; relevant due to the finer grid-spacing in the new sintering model.

**Table S1.** Calculated relative energies of the gas phase Pt<sub>4</sub> tetramers. Comparison of TPSS(h)/aug-cc-pVTZ and PW-DFT results.

| Method               | Isomer I (eV), Tetrahedral               | Isomer II (eV), Planar                   |
|----------------------|------------------------------------------|------------------------------------------|
| TPSS/aug-cc-pVTZ-PP  | -10.75, C <sub>3v</sub> , 3 <sup>1</sup> | -10.45, D <sub>2h</sub> , 3 <sup>2</sup> |
| TPSSh/aug-cc-pVTZ-PP | -9.86, T <sub>d</sub> , 3 <sup>3</sup>   | -9.57, D <sub>4h</sub> , 1 <sup>4</sup>  |

<sup>1</sup> The T<sub>d</sub> structure is slightly higher in energy (~1 kcal/mol) and has two imaginary frequencies.

<sup>2</sup> The quintet is slightly lower in energy (~1 kcal/mol), but is a transition state; both D<sub>2h</sub> structures are favored over D<sub>4h</sub> ones.

<sup>3</sup> The quintet differs by ~2 kcal/mol, but contains two imaginary frequencies.

<sup>4</sup> The quintet differs by ~4 kcal/mol; both the singlet and quintet are transition states.

**Table S2.** Calculated relative energies of the gas phase Pd<sub>1</sub>Pt<sub>3</sub> tetramers. Comparison of TPSS(h)/aug-cc-pVTZ and PW-DFT results.

| Method               | Isomer I (eV), Tetrahedral | Isomer II (eV), Planar                  |
|----------------------|----------------------------|-----------------------------------------|
| TPSS/aug-cc-pVTZ-PP  | -9.75, C <sub>3v</sub> , 3 | -9.48, C <sub>2v</sub> , 5 <sup>1</sup> |
| TPSSh/aug-cc-pVTZ-PP | -9.26, C <sub>1</sub> , 3  | -8.55, C <sub>2v</sub> , 1 <sup>2</sup> |

<sup>1</sup> The triplet is degenerate, differing by < 1 kcal/mol; both are local minima with no imaginary frequencies.

<sup>2</sup> The triplet is degenerate, differing only by half a kcal/mol; the singlet is a transition state, while the triplet is a local minimum.

**Table S3.** Calculated relative energies of the gas phase Pd<sub>2</sub>Pt<sub>2</sub> tetramers. Comparison of TPSS(h)/aug-cc-pVTZ and PW-DFT results.

| Method               | Isomer I (eV), Tetrahedral | Isomer II (eV), PdPdPtPt (planar)       | Isomer III (eV), PdPtPdPt (planar)        |
|----------------------|----------------------------|-----------------------------------------|-------------------------------------------|
| TPSS/aug-cc-pVTZ-PP  | -8.75, C <sub>2v</sub> , 3 | -8.48, C <sub>2v</sub> , 3 <sup>1</sup> | -8.39, D <sub>2h</sub> , 3 <sup>1,2</sup> |
| TPSSh/aug-cc-pVTZ-PP | -8.52, C <sub>2v</sub> , 3 | -7.59, C <sub>2v</sub> , 3 <sup>1</sup> | -7.50, D <sub>2h</sub> , 1 <sup>1</sup>   |

<sup>1</sup> Transition-state.

<sup>2</sup> The singlet is degenerate, slightly higher in energy by ~ 1 kcal/mol.

**Table S4.** Calculated relative energies of the gas phase Pd<sub>3</sub>Pt tetramers. Comparison of TPSS(h)/aug-cc-pVTZ and PW-DFT results.

| Method               | Isomer I (eV), Tetrahedral | Isomer II (eV), Planar                  |
|----------------------|----------------------------|-----------------------------------------|
| TPSS/aug-cc-pVTZ-PP  | -8.40, C <sub>3v</sub> , 3 | -7.40, C <sub>2v</sub> , 1 <sup>1</sup> |
| TPSSh/aug-cc-pVTZ-PP | -7.67, C <sub>3v</sub> , 3 | -6.55, C <sub>2v</sub> , 1 <sup>1</sup> |

<sup>1</sup> Transition-state.

**Table S5.** Calculated relative energies of the gas phase Pd<sub>4</sub> tetramers. Comparison of TPSS(h)/aug-cc-pVTZ and PW-DFT results.

| Method               | Isomer I (eV), Tetrahedral             | Isomer II (eV), Planar                  |
|----------------------|----------------------------------------|-----------------------------------------|
| TPSS/aug-cc-pVTZ-PP  | -7.32, C <sub>1</sub> , 3 <sup>1</sup> | -6.36, D <sub>4h</sub> , 1 <sup>2</sup> |
| TPSSh/aug-cc-pVTZ-PP | -6.56, C <sub>1</sub> , 3 <sup>3</sup> | -5.49, D <sub>4h</sub> , 1 <sup>2</sup> |

<sup>1</sup> The T<sub>d</sub> structure is slightly higher in energy (< 1 kcal/mol) and has two imaginary frequencies.

<sup>2</sup> Transition-state.

<sup>3</sup> The T<sub>d</sub> and C<sub>3v</sub> structures are slightly higher in energy (< 1 kcal/mol) and have two imaginary frequencies

**Table S6.** NBO Population Analysis of Charges at higher levels of theory compared to Quantum Espresso of Planar Structures of Mixed Gas Phase Clusters<sup>1</sup>

| Config.                             | TPSSh/NBO |      |                             |                | QE/Bader       |
|-------------------------------------|-----------|------|-----------------------------|----------------|----------------|
|                                     | Spin      | Atom | Natural Charge <sup>2</sup> | Valence Charge | Valence Charge |
| <b>Pt<sub>3</sub>Pd</b>             | 1         | Pd   | 0.20990                     | 0.21           | 0.21           |
|                                     |           | Pt   | -0.03374                    | -0.04          | 0.02           |
|                                     |           | Pt   | -0.08808                    | -0.08          | -0.11          |
|                                     |           | Pt   | -0.08808                    | -0.08          | -0.11          |
| <b>Pd<sub>2</sub>Pt<sub>2</sub></b> | 3         | Pd   | 0.10776                     | 0.11           | 0.12           |
| <b>(PdPdPtPt)</b>                   |           | Pt   | -0.10776                    | -0.10          | 0.00           |
|                                     |           | Pd   | 0.10776                     | 0.11           | 0.02           |
|                                     |           | Pt   | -0.10776                    | -0.10          | -0.15          |
| <b>Pd<sub>2</sub>Pt<sub>2</sub></b> | 1         | Pt   | -0.18063                    | -0.18          | -0.13          |
| <b>(PdPtPdPt)</b>                   |           | Pt   | -0.18063                    | -0.18          | -0.13          |
|                                     |           | Pd   | 0.18063                     | 0.19           | 0.13           |
|                                     |           | Pd   | 0.18063                     | 0.19           | 0.13           |
| <b>Pd<sub>3</sub>Pt</b>             | 1         | Pt   | -0.25211                    | -0.26          | -0.12          |
|                                     |           | Pd   | 0.06741                     | 0.06           | -0.07          |
|                                     |           | Pd   | 0.09235                     | 0.09           | 0.09           |
|                                     |           | Pd   | 0.09235                     | 0.09           | 0.09           |

<sup>1</sup> Pure Pd and Pt planar structures demonstrated charges of 0.00 in the singlet and triplet state. Only in the quintet state did the atoms attain a charge, Pt<sub>4</sub> alternated a natural charge of -/+ 0.13621 e/Pt and Pd<sub>4</sub> alternated -/+ 0.18843 e/Pd for a summation of 0.00 natural charge.

<sup>2</sup> The natural charge in Gaussian 09 considers shifts in electronic population between the core, valence, and Rydberg states.

**Table S7.** NBO Population Analysis of Charges at higher levels of theory compared to Quantum Espresso of Tetrahedral Structures of Mixed Gas Phase Clusters<sup>1</sup>

|                                     | TPSSH/NBO |      |                             |                | QE/Bader       |
|-------------------------------------|-----------|------|-----------------------------|----------------|----------------|
| Config.                             | Spin      | Atom | Natural Charge <sup>2</sup> | Valence Charge | Valence Charge |
| <b>Pt<sub>3</sub>Pd</b>             | 3         | Pd   | 0.17514                     | 0.19           | 0.15           |
|                                     |           | Pt   | -0.10488                    | -0.11          | -0.10          |
|                                     |           | Pt   | -0.03510                    | -0.05          | -0.05          |
|                                     |           | Pt   | -0.03510                    | -0.05          | 0.00           |
| <b>Pd<sub>2</sub>Pt<sub>2</sub></b> | 3         | Pt   | -0.12715                    | -0.13          | -0.16          |
|                                     |           | Pt   | -0.12715                    | -0.13          | -0.05          |
|                                     |           | Pd   | 0.12715                     | 0.13           | 0.11           |
|                                     |           | Pd   | 0.12715                     | 0.13           | 0.10           |
| <b>Pd<sub>3</sub>Pt</b>             | 3         | Pt   | -0.19381                    | -0.19          | -0.17          |
|                                     |           | Pd   | 0.06459                     | 0.07           | 0.09           |
|                                     |           | Pd   | 0.06461                     | 0.07           | 0.05           |
|                                     |           | Pd   | 0.06461                     | 0.07           | 0.02           |

<sup>1</sup> Pure Pd and Pt tetrahedral structures demonstrated charges of 0.00.

<sup>2</sup> The natural charge in Gaussian 09 considers shifts in electronic population between the core, valence, and Rydberg states.
